# Supplementary material
Source: PubMed Central journal article supplement (PMC7107438)

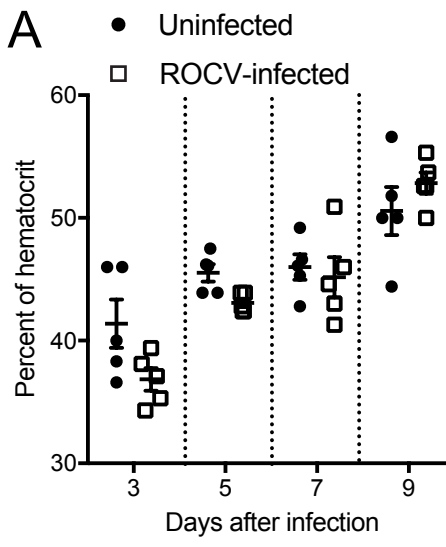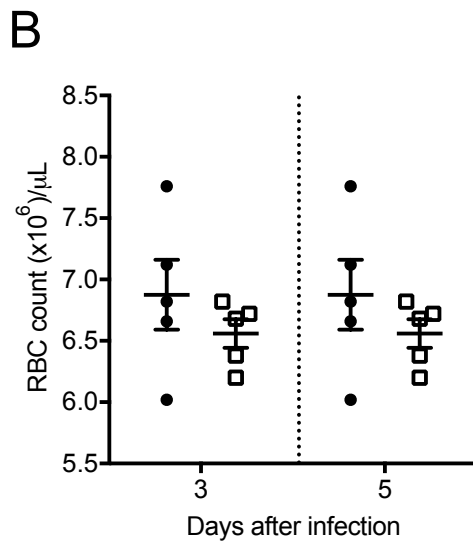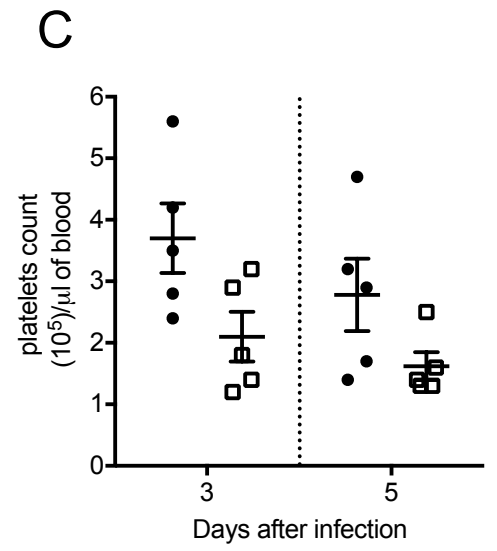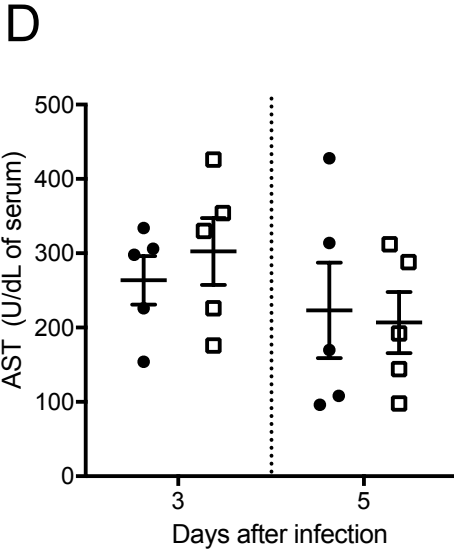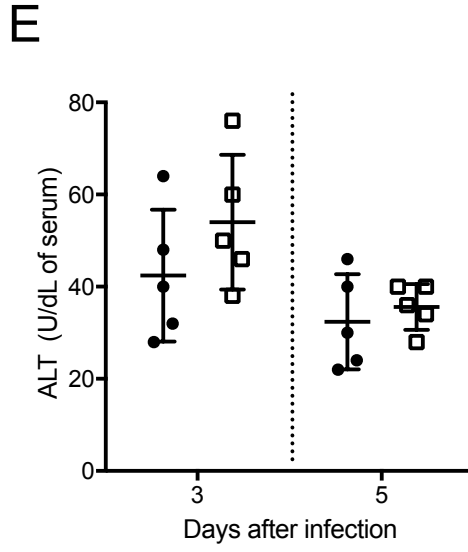

Supplement: jiz029_suppl_supplementary_figure_1.pdf [file jiz029_suppl_supplementary_figure_1.pdf]

A)

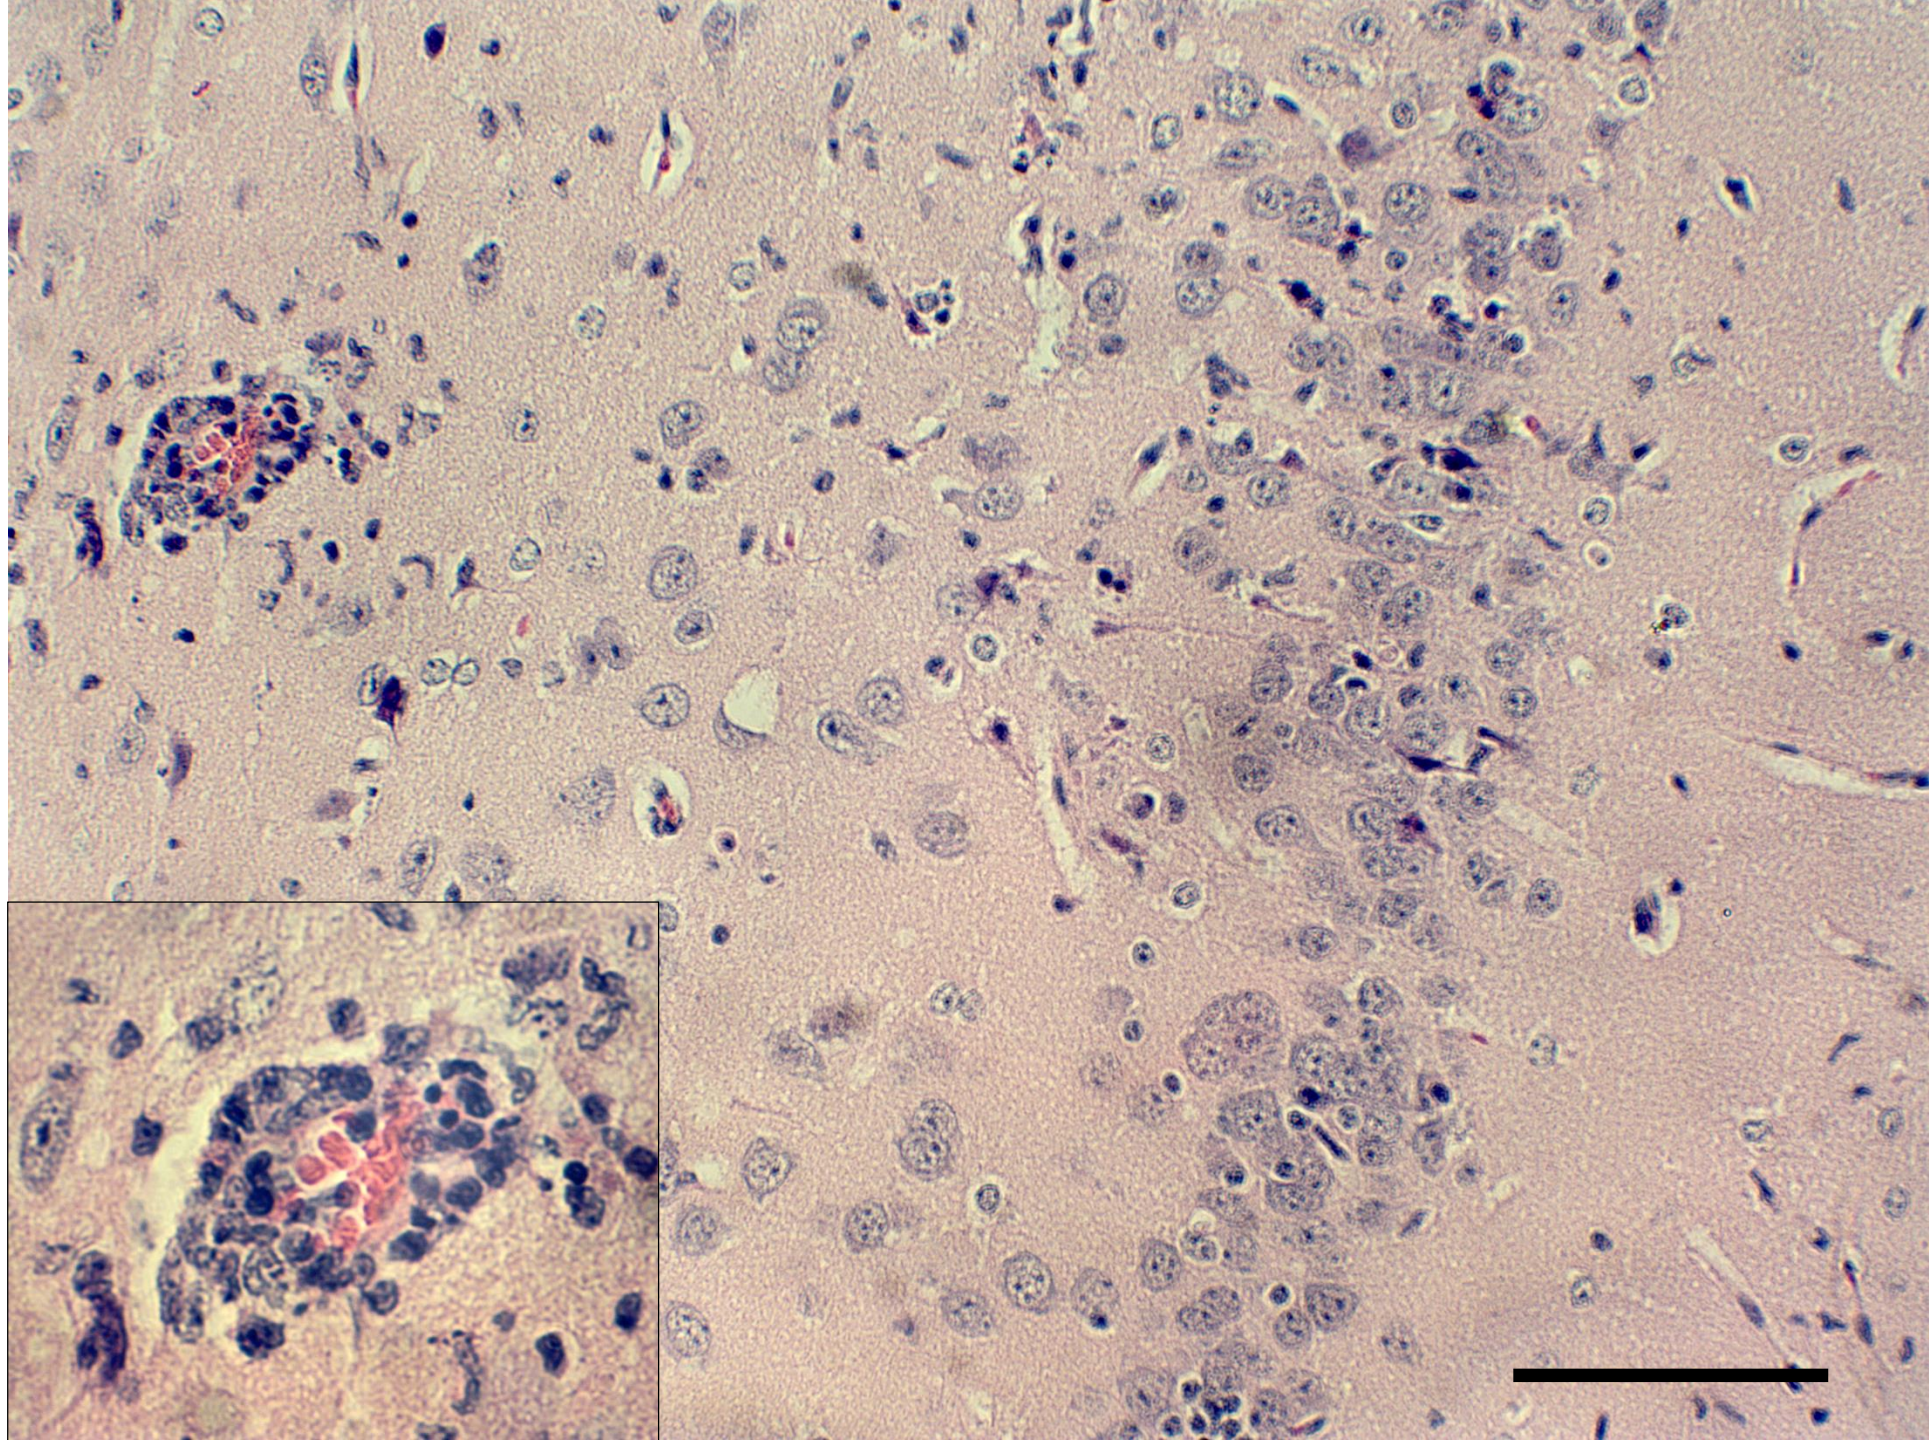

**B)**

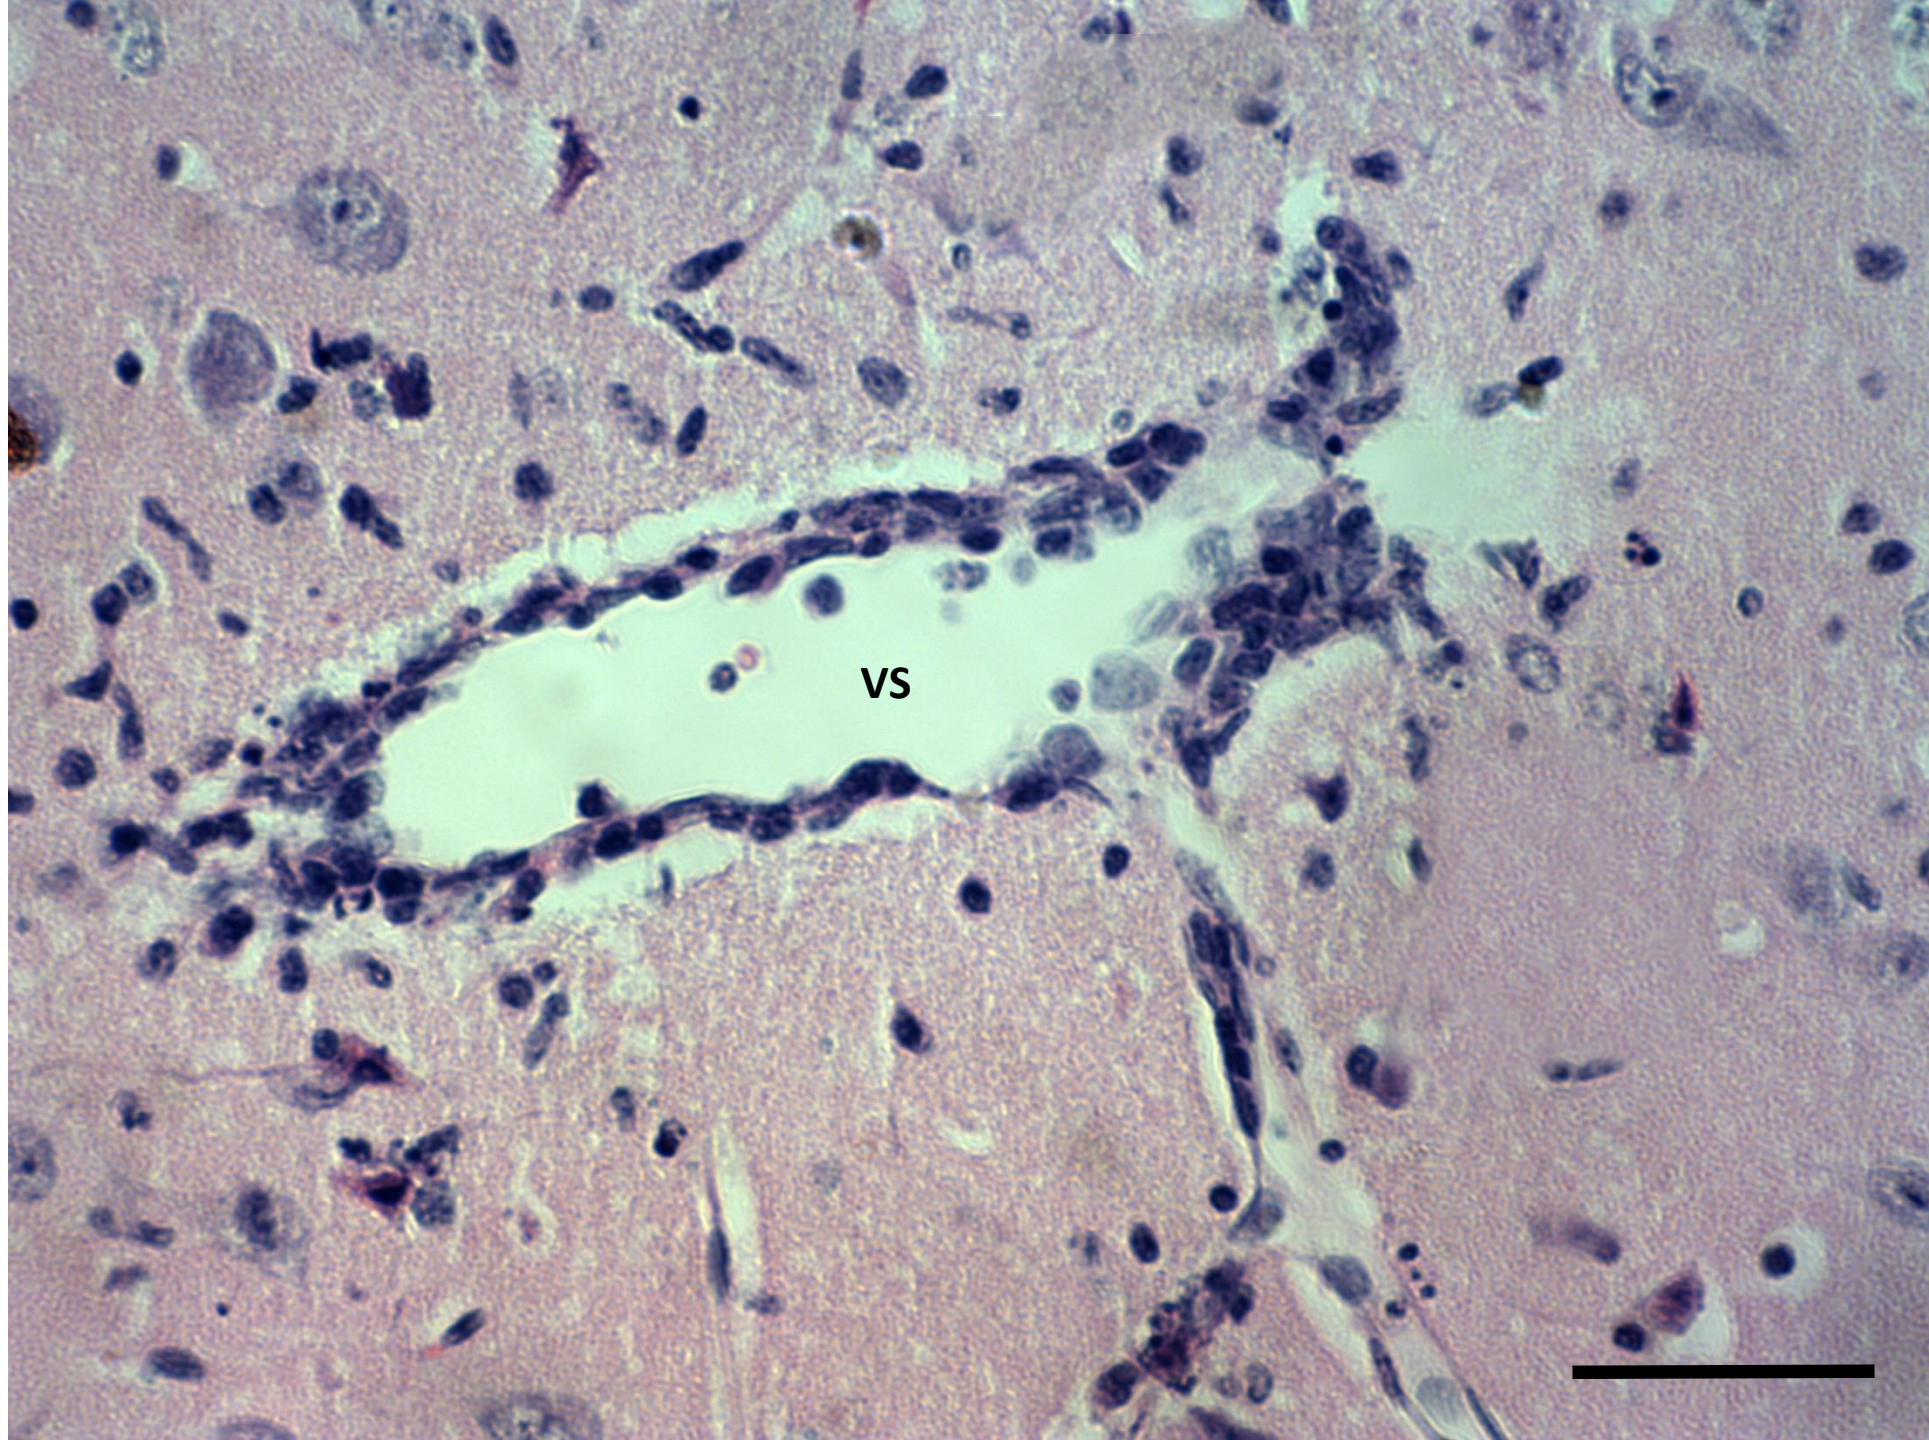

C)

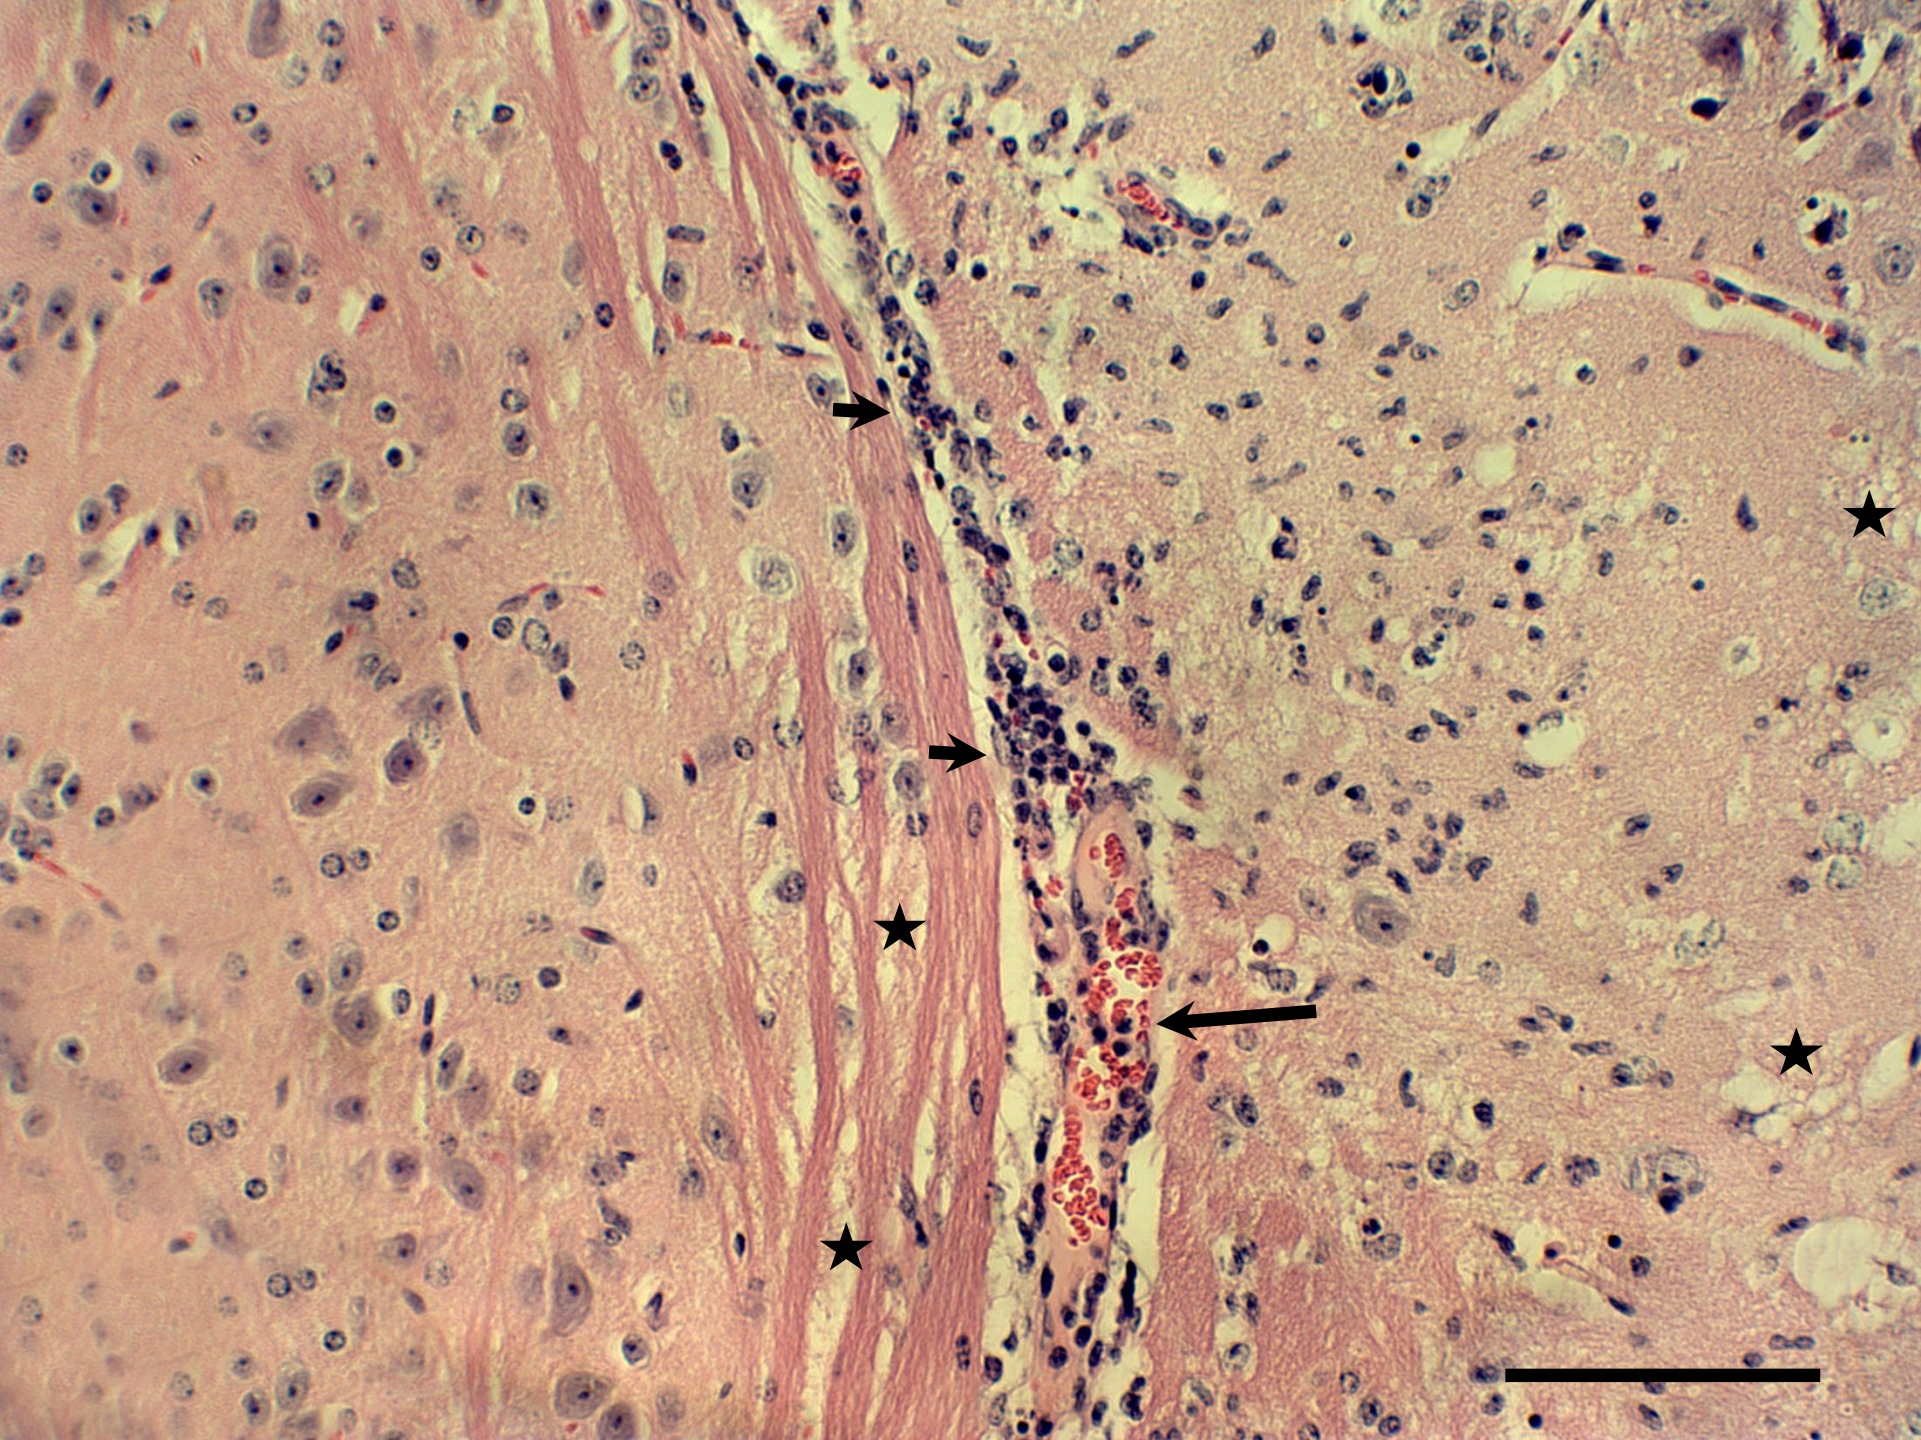

Supplement: jiz029_suppl_supplementary_figure_2.pdf [file jiz029_suppl_supplementary_figure_2.pdf]
